# Supplementary material
Source: ML conference proceedings conference paper supplement (https://openreview.net/forum?id=g9olLDlaqH)

# Superiority of Implicit-Implicit Analysis over number of test rollout steps for $\phi \approx 0.01$ and $\psi = 0.003$

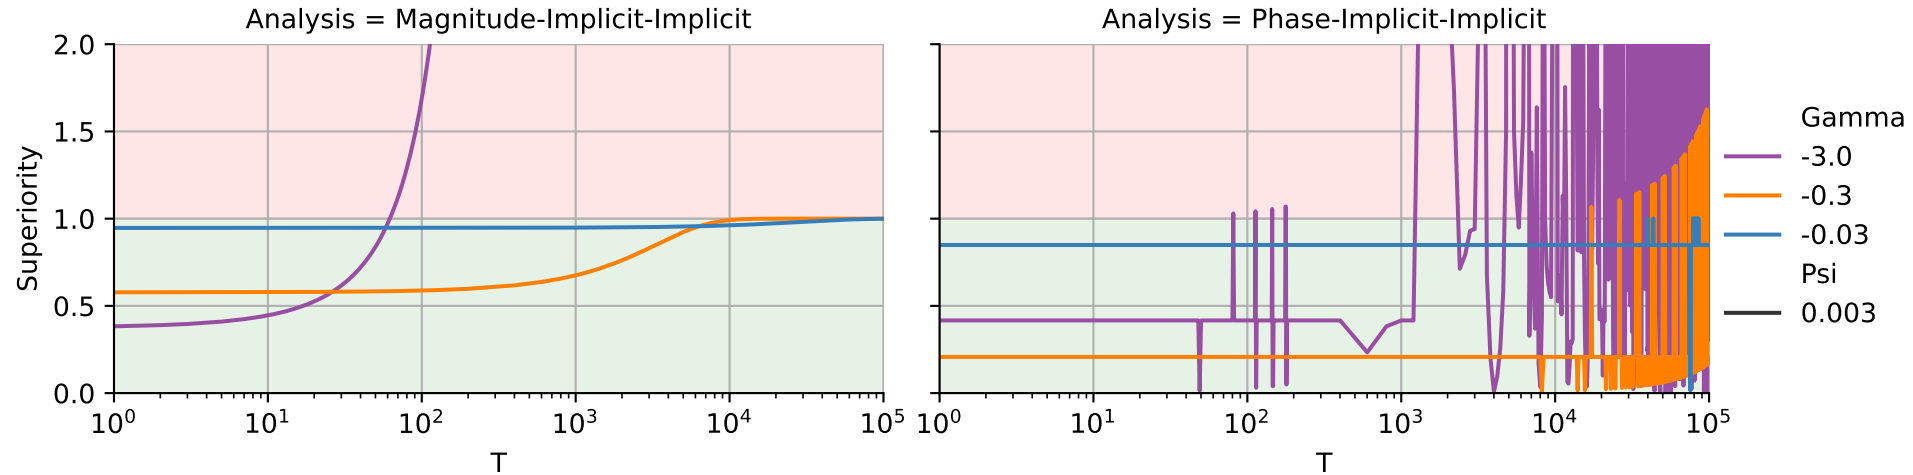

Supplement: supplementary_material [file advection_superiority_over_T.pdf › neural_emulator_superiority__supplemental_material/symbolic_theoretical/advection_superiority_over_T.pdf]
