# Supplementary material
Source: ML conference proceedings conference paper supplement (https://openreview.net/forum?id=g9olLDlaqH)

ConvNet Dilated ResNet FNO Vanilla Transformer

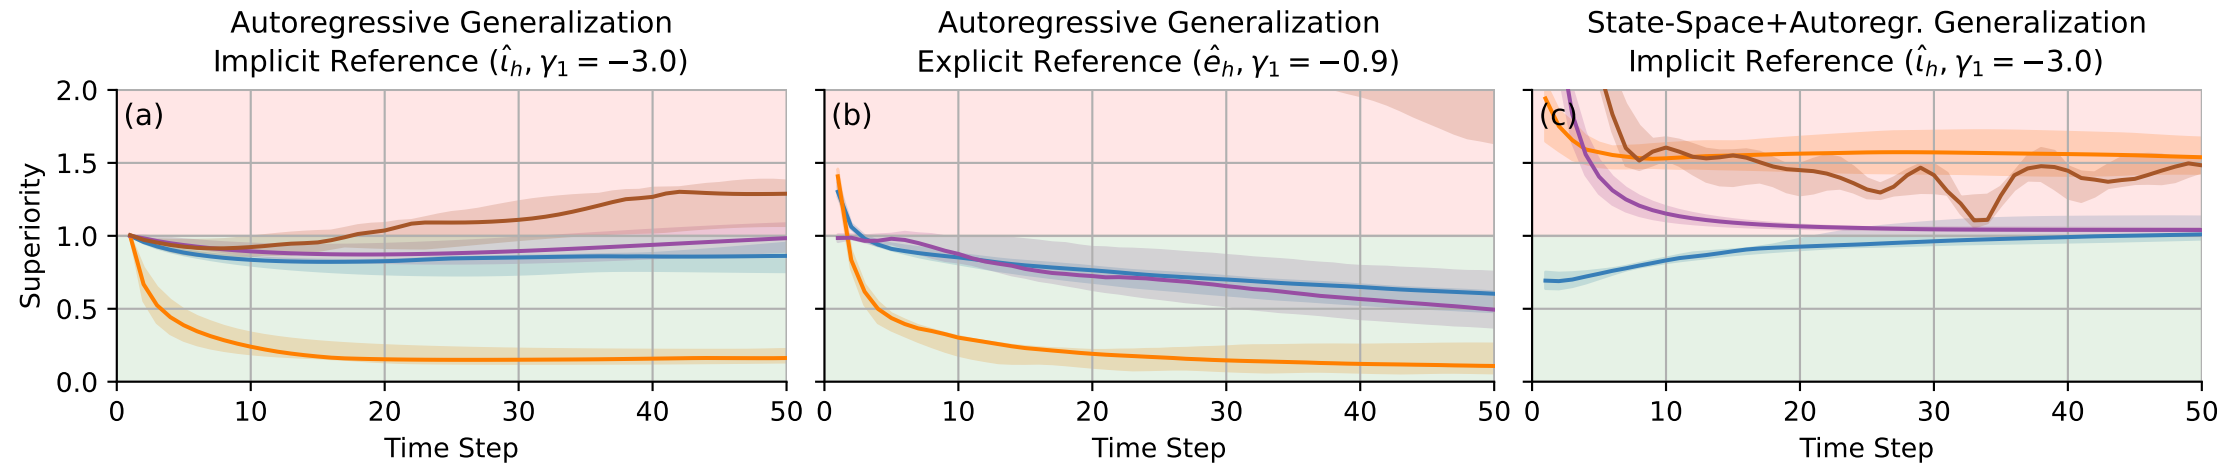

Supplement: supplementary_material [file advection_nonlinear_emulator_experiment.pdf › neural_emulator_superiority__supplemental_material/experiments/advection_nonlinear_emulator_experiment.pdf]

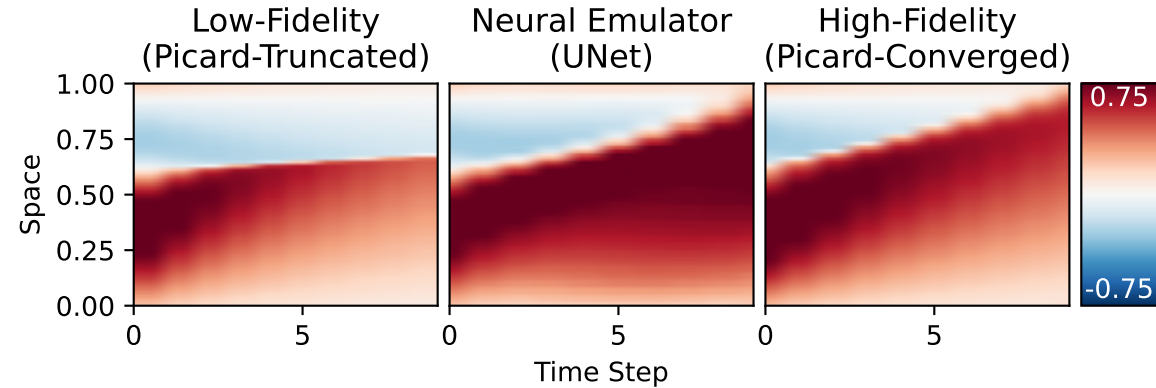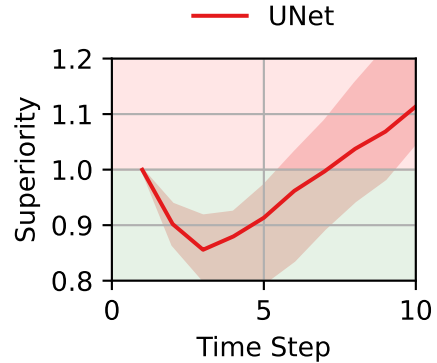

Supplement: supplementary_material [file burgers_experiment.pdf › neural_emulator_superiority__supplemental_material/experiments/burgers_experiment.pdf]

# Solution evolution

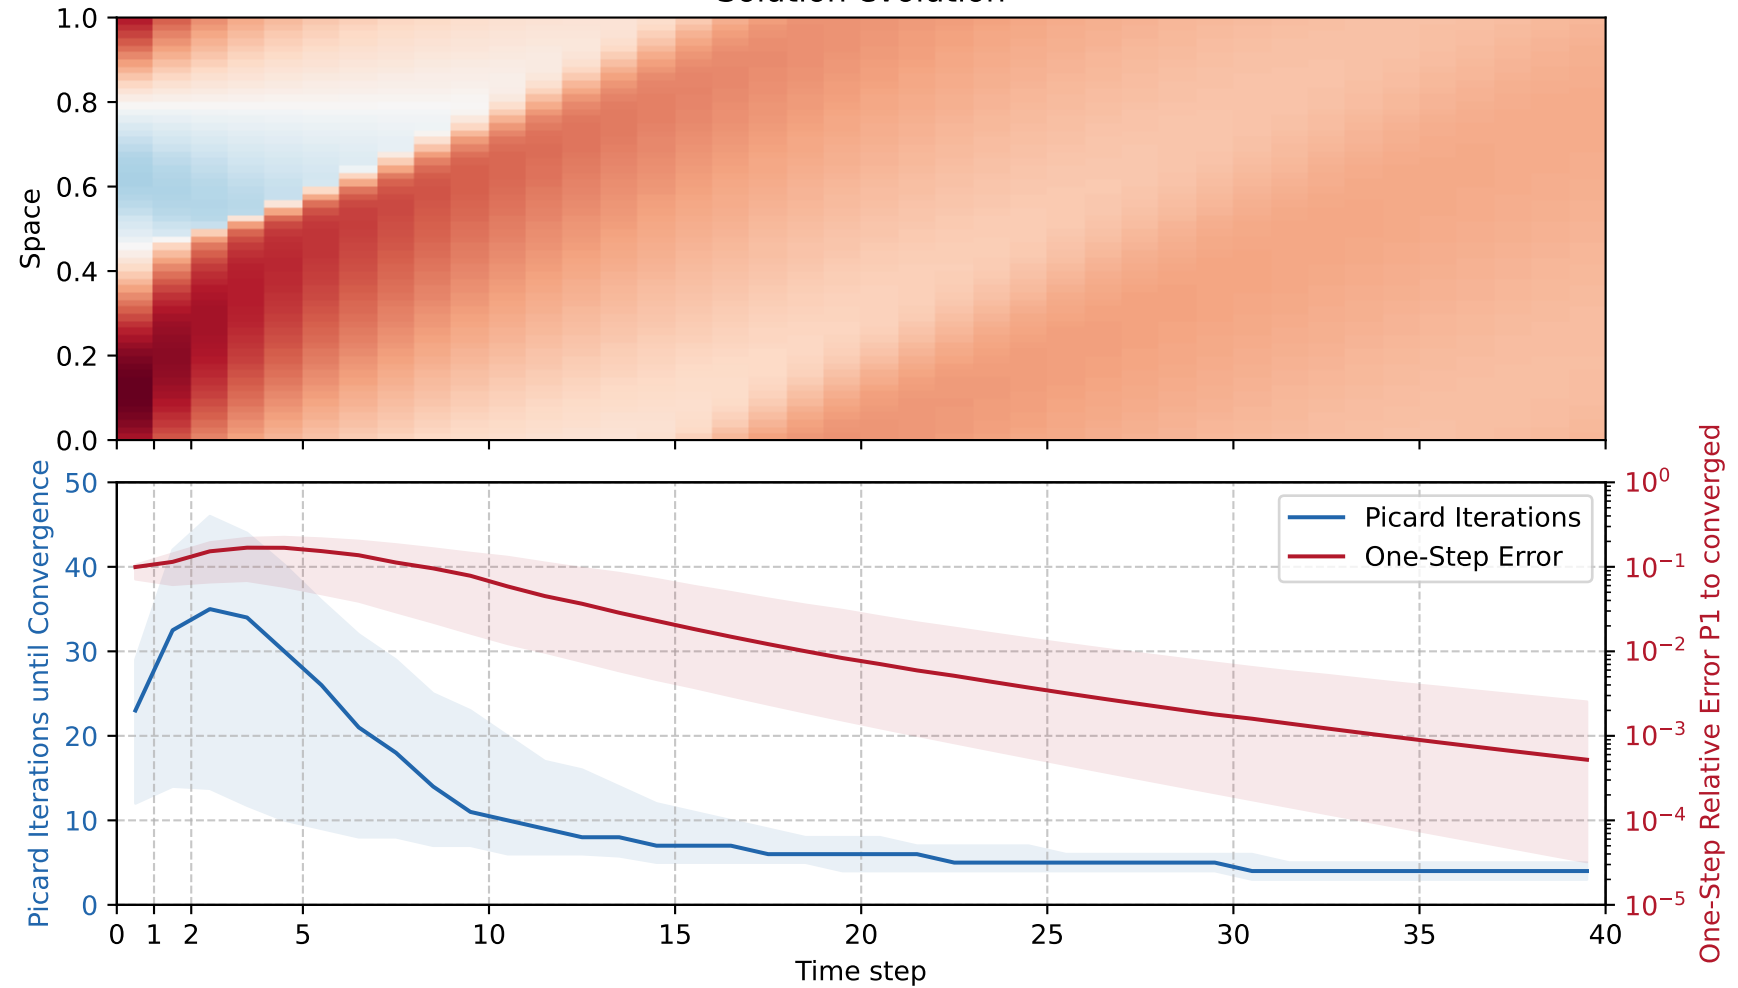

Supplement: supplementary_material [file picard_analysis.pdf › neural_emulator_superiority__supplemental_material/experiments/picard_analysis.pdf]

(a) Magnitude Error

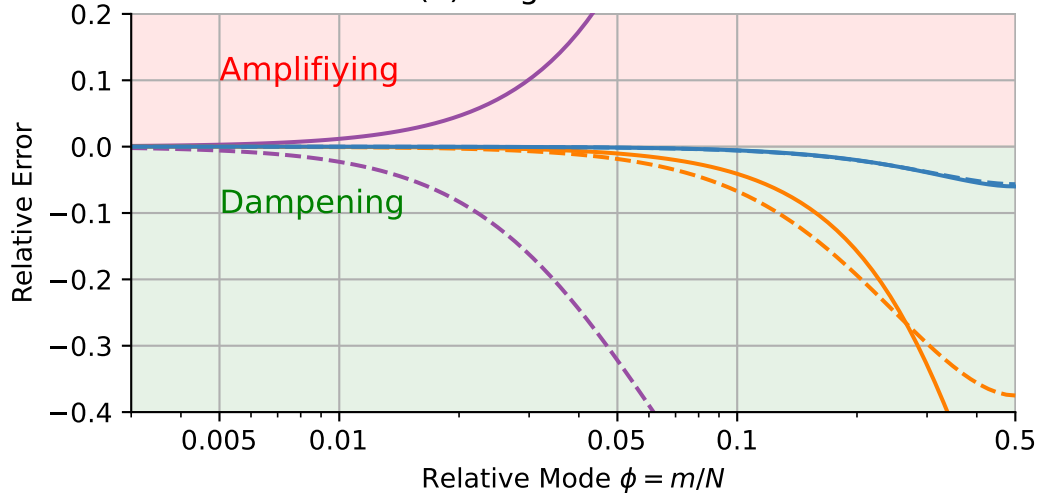

(b) Phase Error

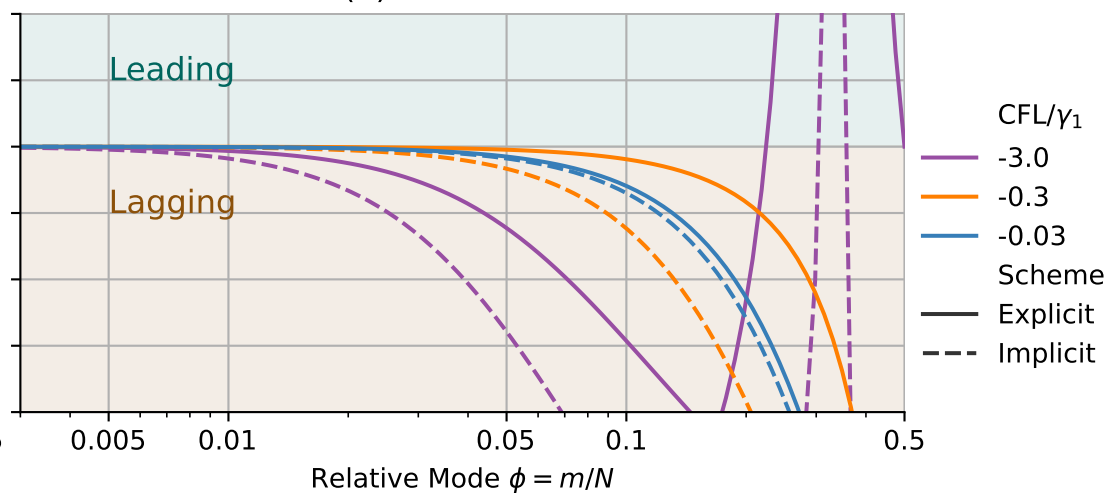

Supplement: supplementary_material [file advection_scheme_error_analysis.pdf › neural_emulator_superiority__supplemental_material/symbolic_theoretical/advection_scheme_error_analysis.pdf]

(a) Magnitude Superiority

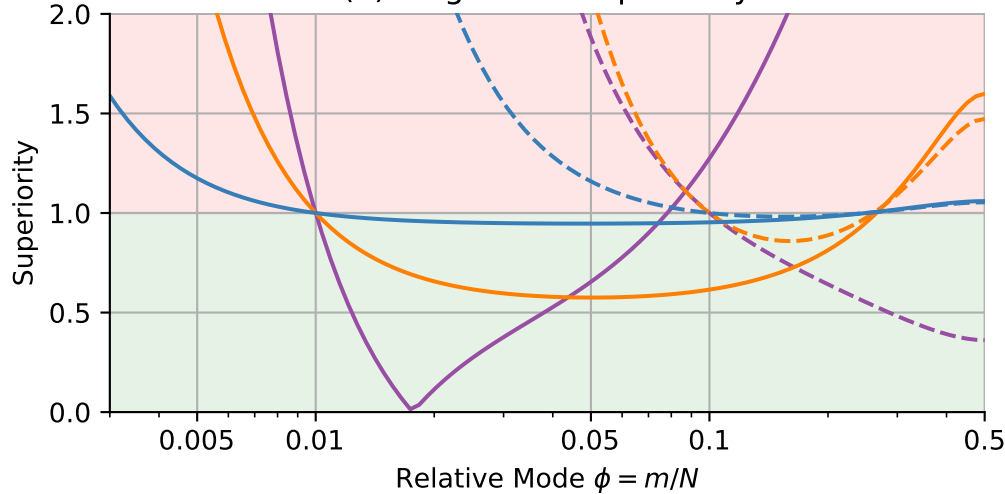

(b) Phase Superiority

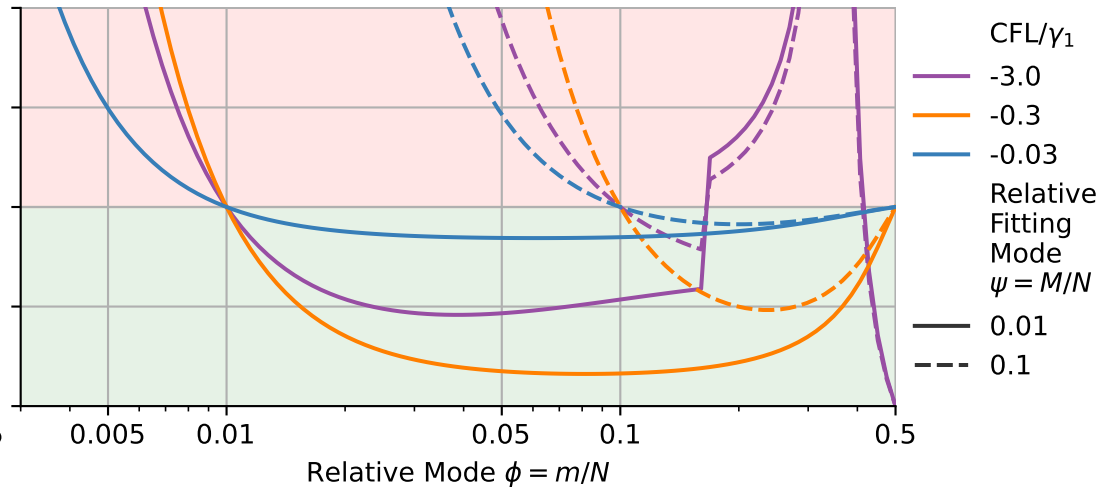

Supplement: supplementary_material [file advection_superiority_analysis.pdf › neural_emulator_superiority__supplemental_material/symbolic_theoretical/advection_superiority_analysis.pdf]

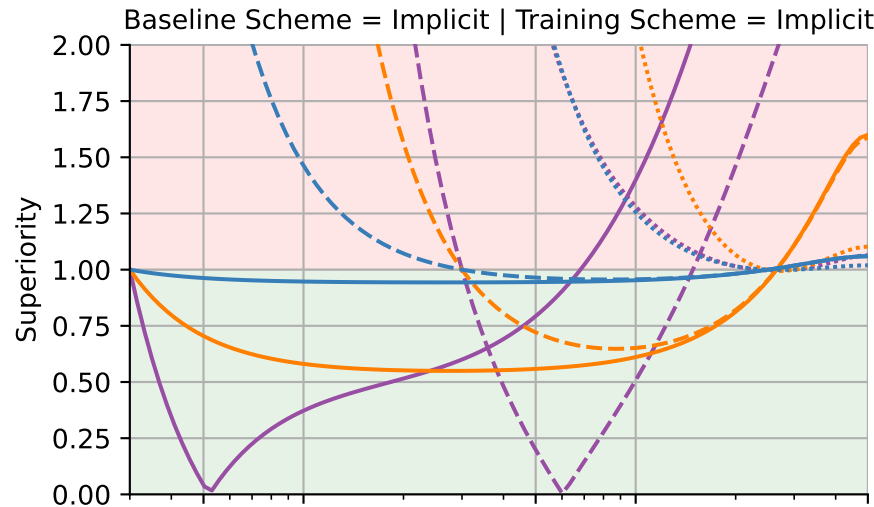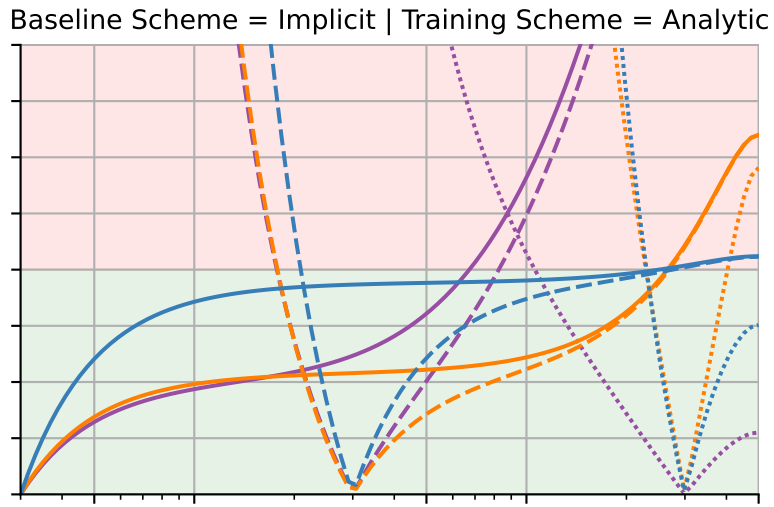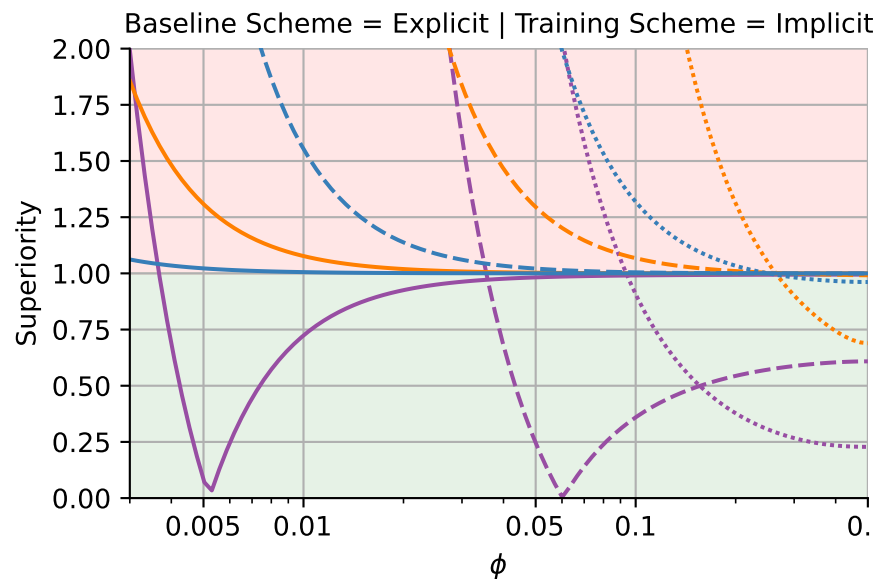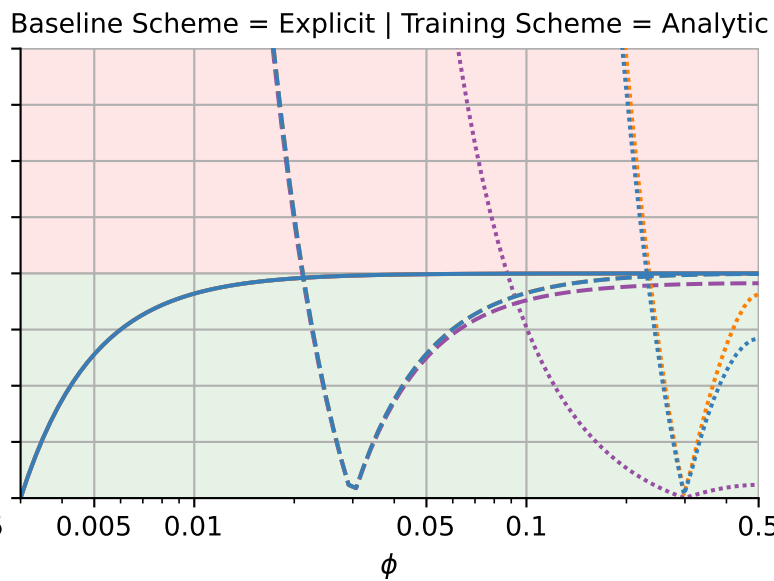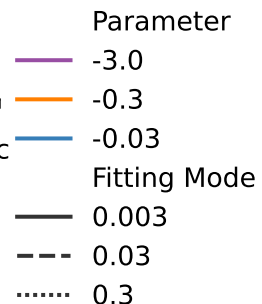

Supplement: supplementary_material [file advection_superiority_analysis_more_combinations.pdf › neural_emulator_superiority__supplemental_material/symbolic_theoretical/advection_superiority_analysis_more_combinations.pdf]

(a) Diffusion

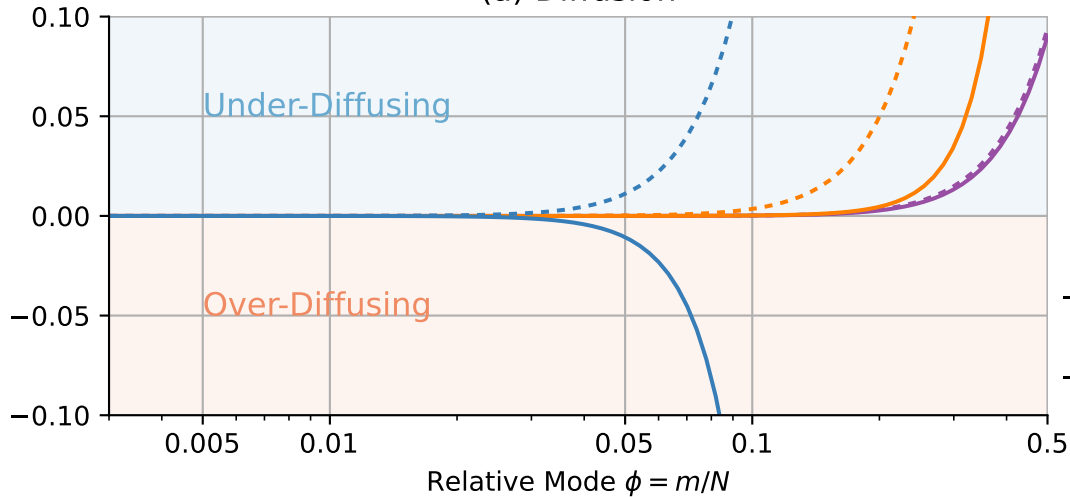

(b) Poisson

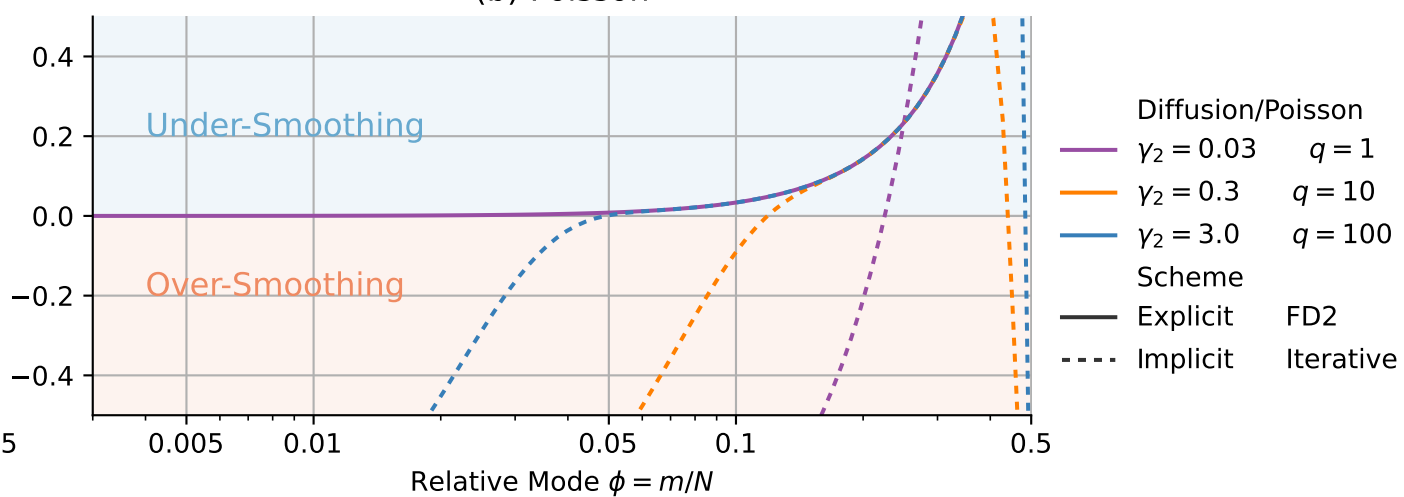

Supplement: supplementary_material [file diffusion_and_poisson_error_analysis.pdf › neural_emulator_superiority__supplemental_material/symbolic_theoretical/diffusion_and_poisson_error_analysis.pdf]

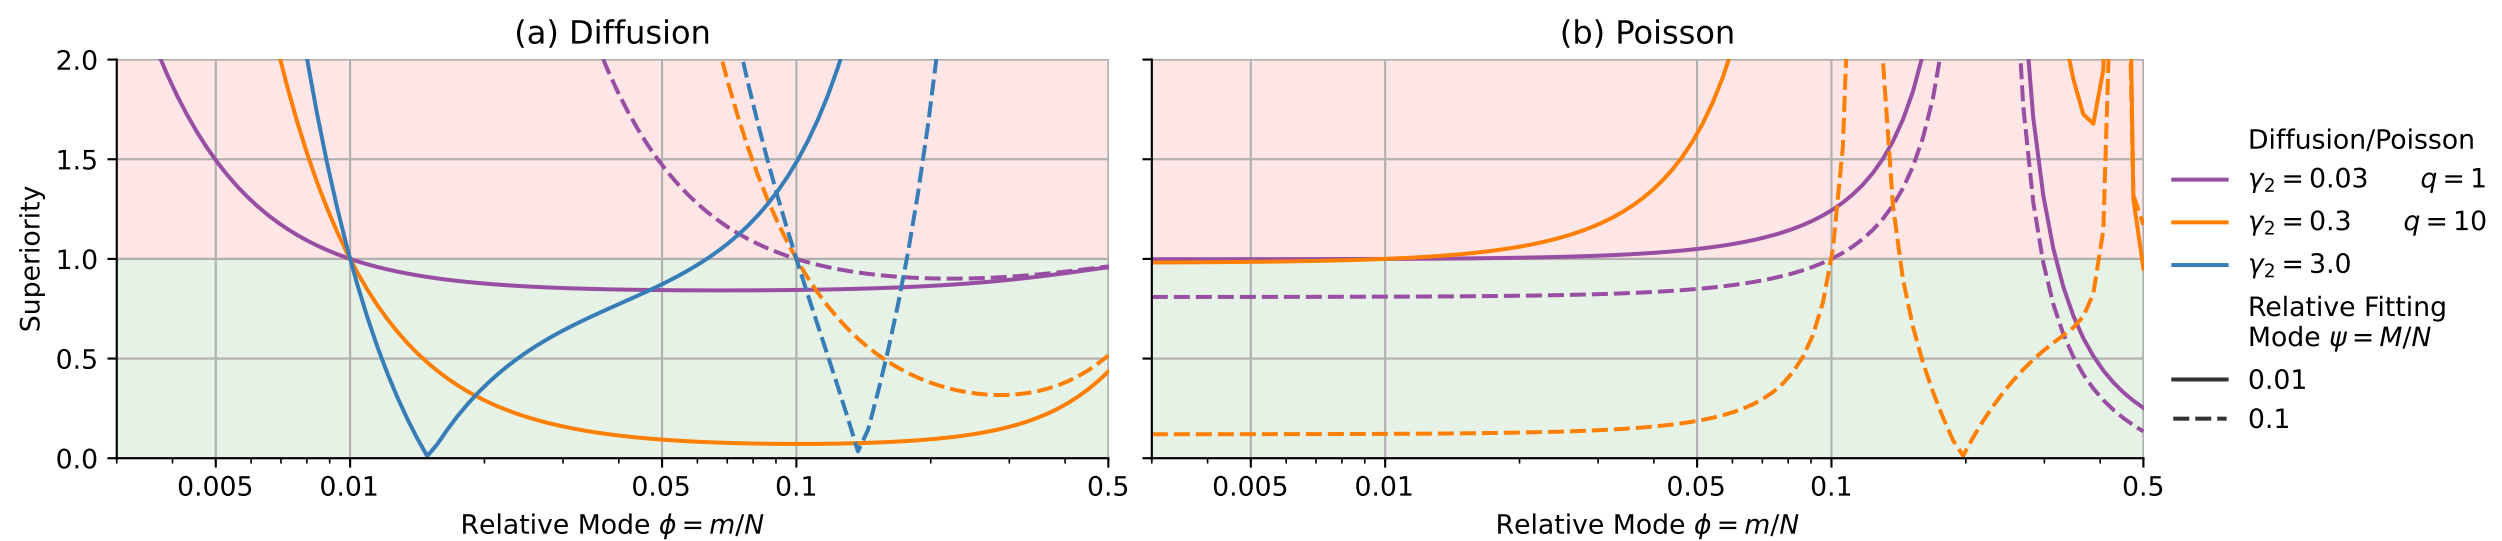

Supplement: supplementary_material [file diffusion_and_poisson_superiority_analysis.pdf › neural_emulator_superiority__supplemental_material/symbolic_theoretical/diffusion_and_poisson_superiority_analysis.pdf]

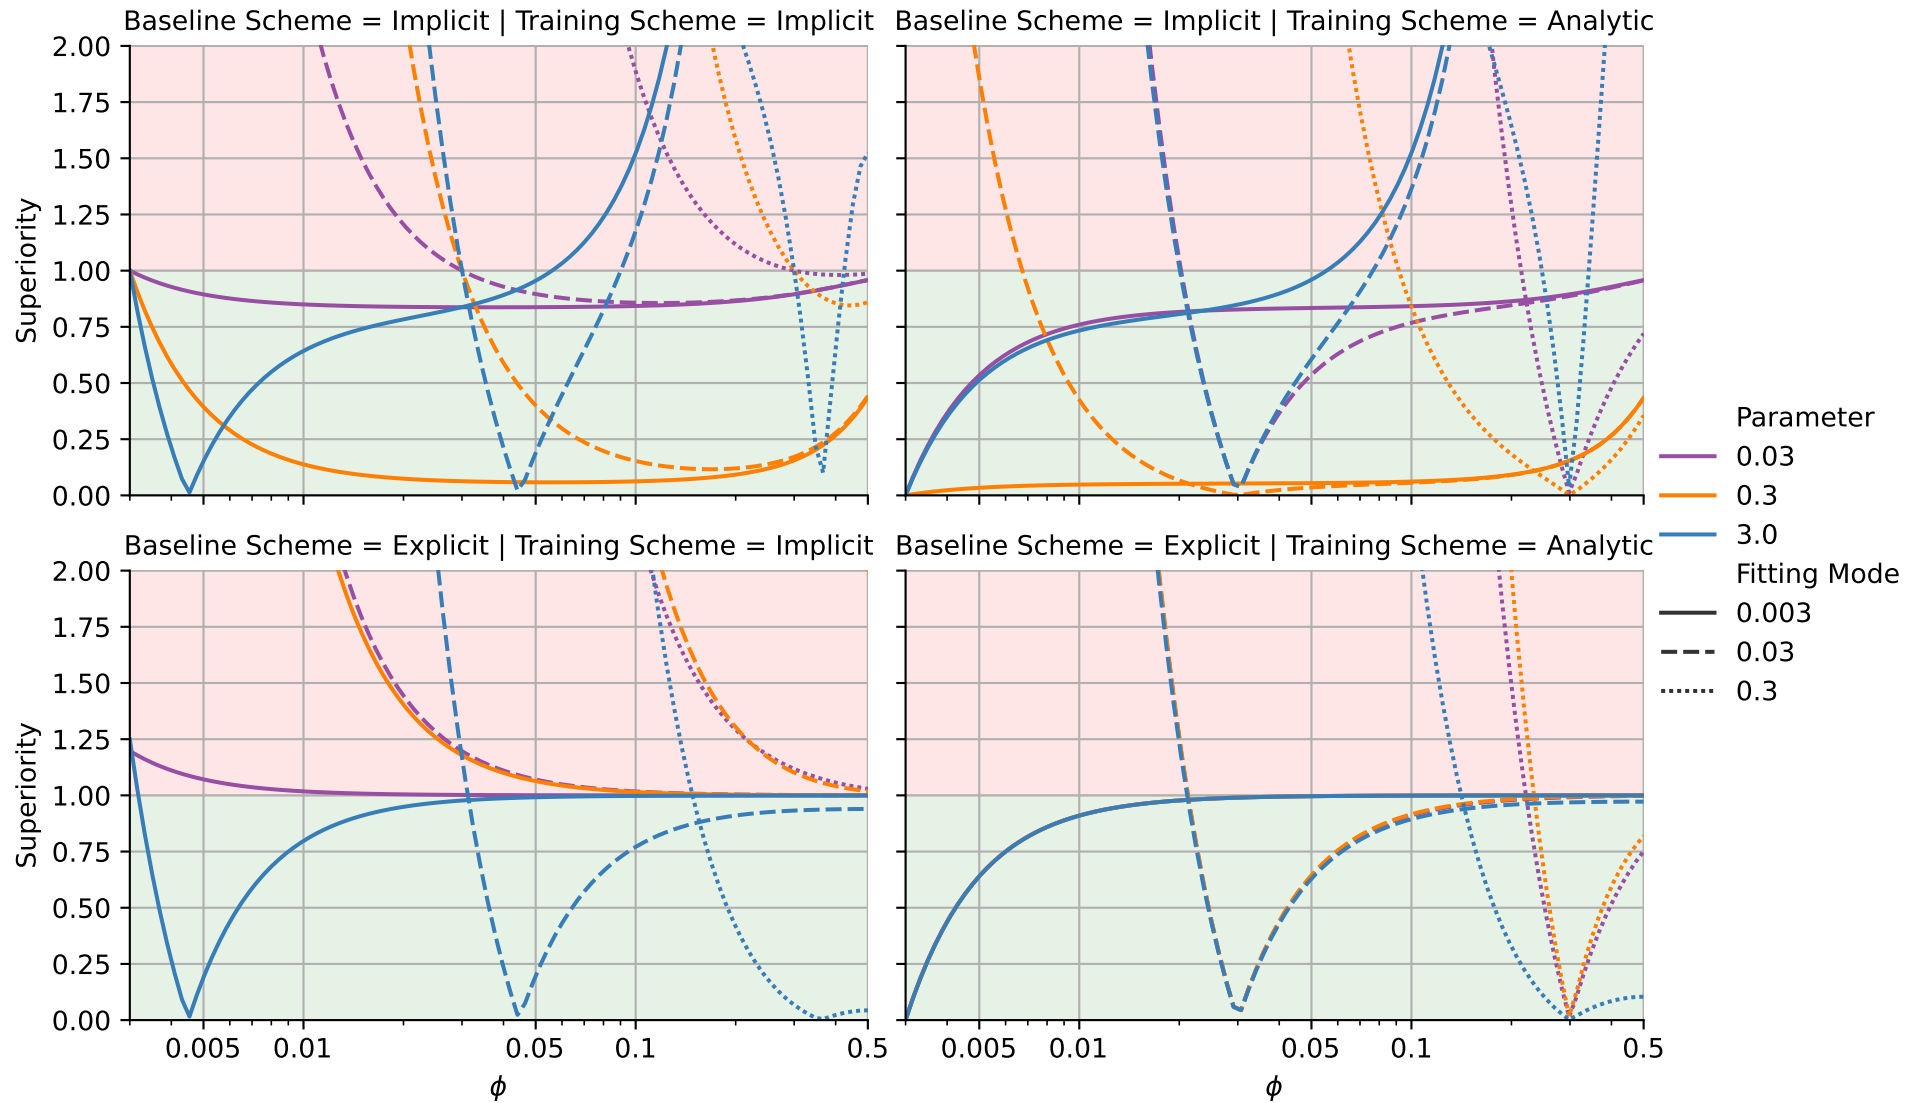

Supplement: supplementary_material [file diffusion_superiority_analysis_more_combinations.pdf › neural_emulator_superiority__supplemental_material/symbolic_theoretical/diffusion_superiority_analysis_more_combinations.pdf]

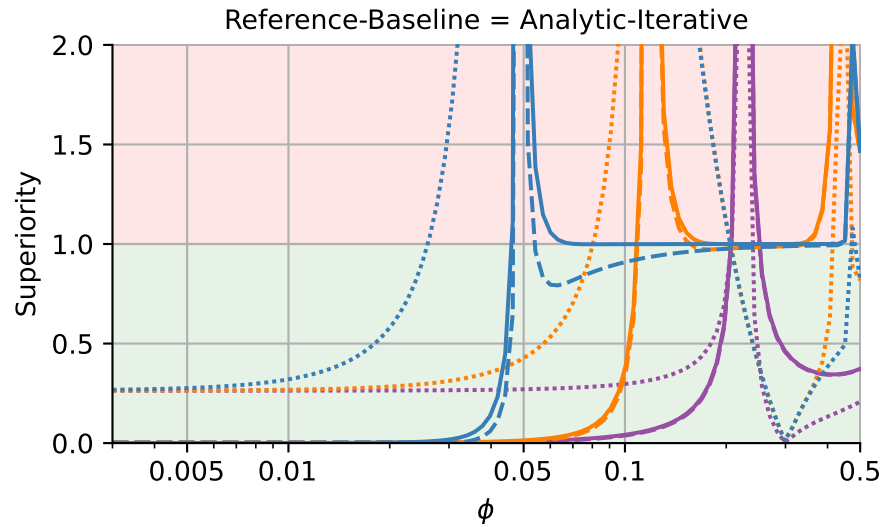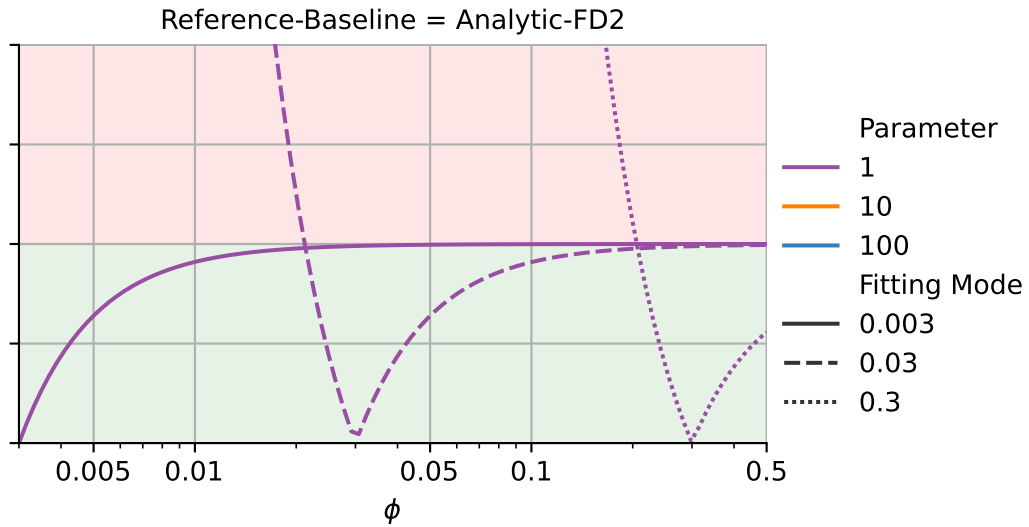

Supplement: supplementary_material [file poisson_superiority_analysis_more_combinations_using_analytic.pdf › neural_emulator_superiority__supplemental_material/symbolic_theoretical/poisson_superiority_analysis_more_combinations_using_analytic.pdf]

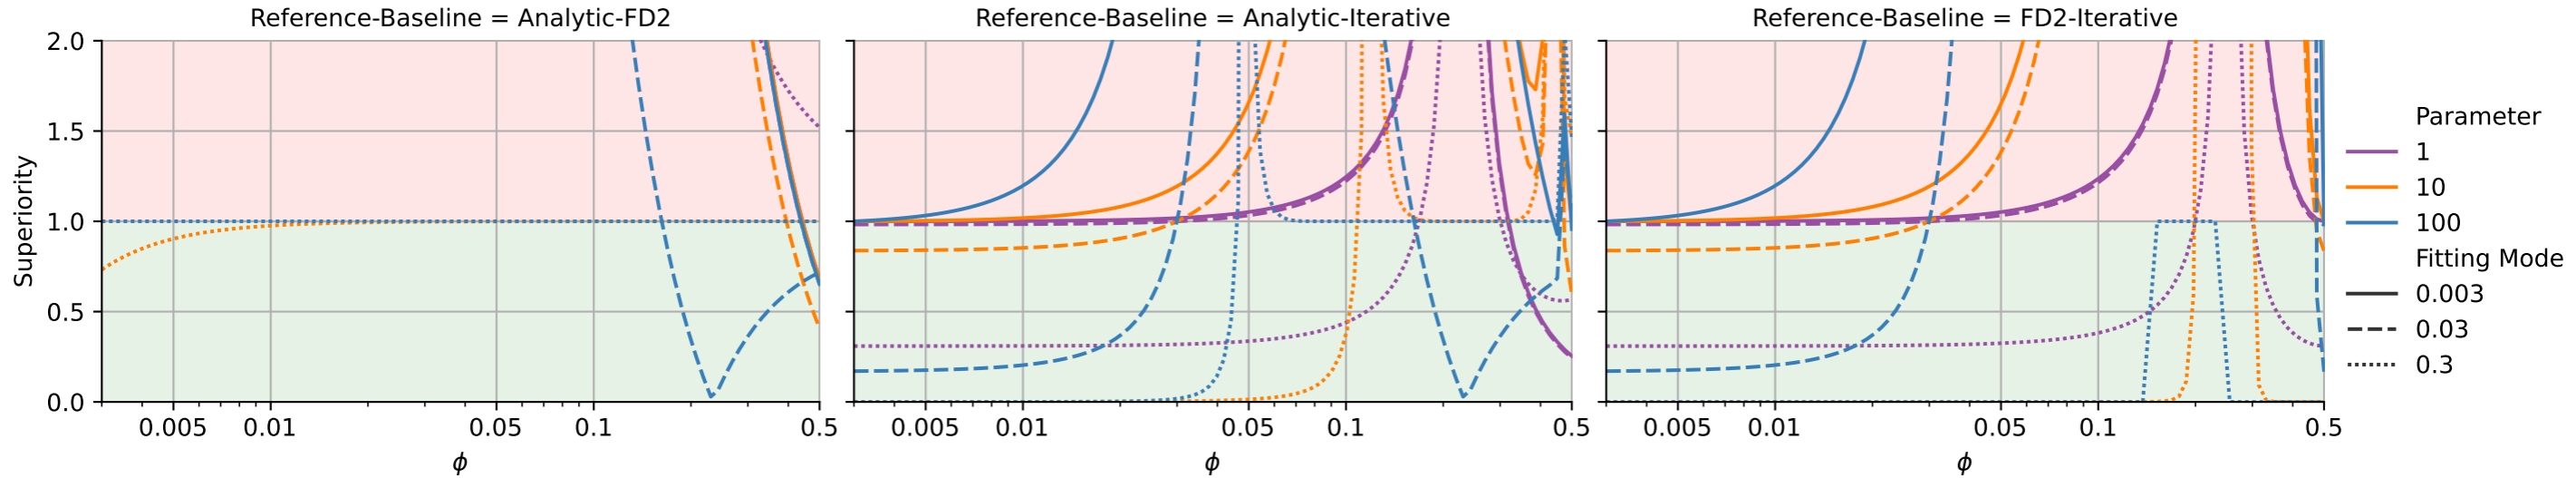

Supplement: supplementary_material [file poisson_superiority_analysis_more_combinations_using_iterative.pdf › neural_emulator_superiority__supplemental_material/symbolic_theoretical/poisson_superiority_analysis_more_combinations_using_iterative.pdf]
